# Supplementary material for: In situ preparation of CdS decorated ZnWO4 nanorods as a photocatalyst for direct conversion of sunlight into fuel and RhB degradation
Source: Royal Society of Chemistry journal article supplement (doi:10.1039/c8se00632f), 2019-01-01
Supplement: c8se00632f1.pdf [file c8se00632f1.pdf]

***In situ* preparation of CdS decorated ZnWO<sub>4</sub> nanorods as a photocatalyst for direct conversion of sunlight into fuel and RhB degradation.**

Yogesh A. Sethi,<sup>a</sup> Rajendra P. Panmand,<sup>a</sup> Anuradha Ambalkar,<sup>a</sup> Aniruddha K. Kulkarni,<sup>a</sup> Deepak R. Patil, Aarti R. Gunjal,<sup>a</sup> Suresh W. Gosavi,<sup>b</sup> Milind V. Kulkarni,<sup>a\*</sup> Bharat B. Kale<sup>a\*</sup>

**Electronic Supporting Information**

ESI 1 :

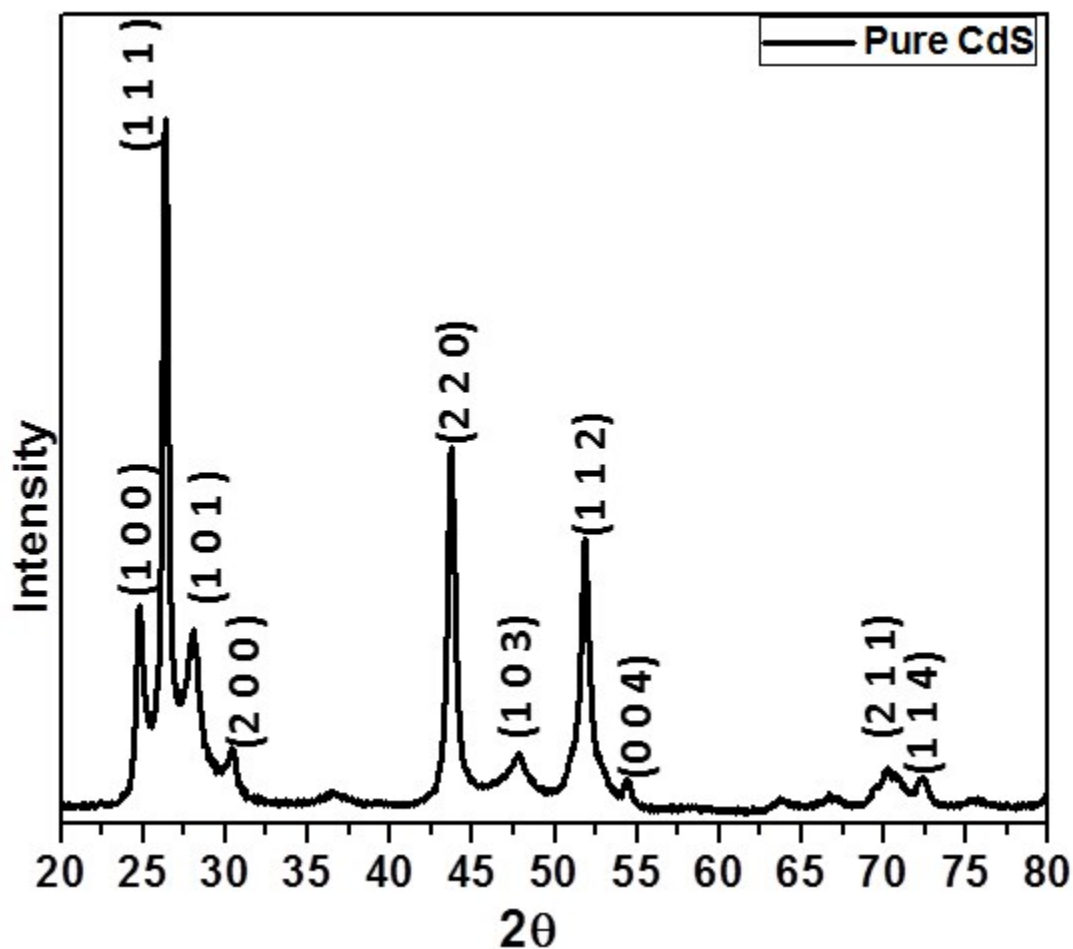

ESI I: XRD Patterns of Pure CdS.

## ESI-2: the temporal evolution of the absorption spectra of RhB aqueous solution

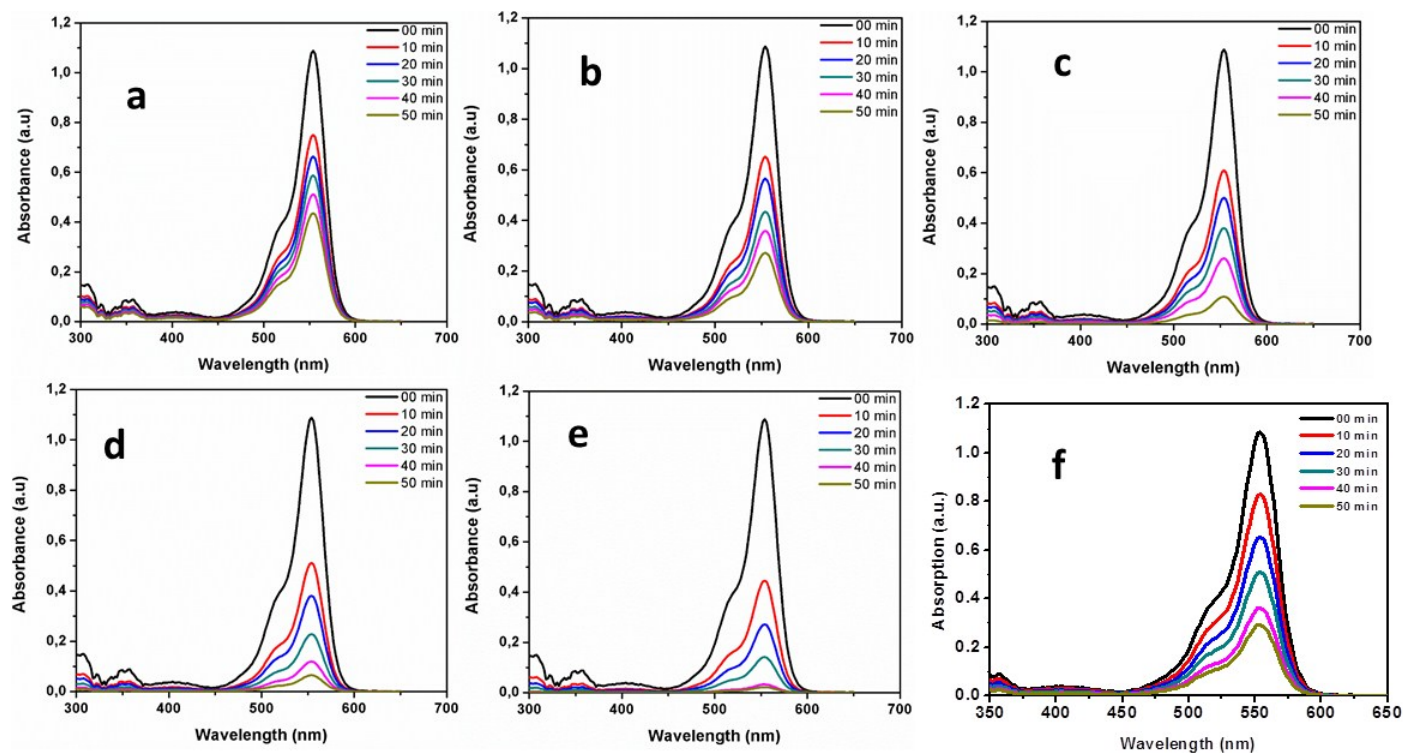

The temporal evolution of the absorption spectra of RhB aqueous solution catalysed by the (a) pure ZnWO<sub>4</sub> (CZW-0) and CdS@ZnWO<sub>4</sub> samples (CZW-1 (b), 2 (c), 3 (d), 4 (e) & Pure CdS (f)) under solar light irradiation
